# Supplementary material for: The Feasibility and Preliminary Efficacy of an eHealth Lifestyle Program in Women with Recent Gestational Diabetes Mellitus: A Pilot Study
Source: PubMed Central journal article supplement (PMC7579575; doi:10.3390/ijerph17197115), 2020-09-28
Supplement: ijerph-17-07115-s001.pdf [file ijerph-17-07115-s001.pdf]

**Supplementary Table 1.** Frequency of responses to process evaluation questions for the intervention groups (high personalisation,  $n =$  in a 6-month pilot randomised controlled trial for women with recent GDM who were at risk of developing T2D).

| Program element                       | Question                                                               | 3                               | 6                  |
|---------------------------------------|------------------------------------------------------------------------|---------------------------------|--------------------|
|                                       |                                                                        | months <sup>a</sup><br>$n = 25$ | months<br>$n = 21$ |
|                                       |                                                                        | % ( $n$ )                       | % ( $n$ )          |
| Australian Eating Survey report       | I read/saw the Australian Eating Survey report                         |                                 |                    |
|                                       | Yes                                                                    | 88 (22)                         | 81 (17)            |
|                                       | No                                                                     | 12 (3)                          | 19 (4)             |
|                                       | Easy to understand                                                     |                                 |                    |
|                                       | Agree/Strongly agree                                                   | 89 (17)                         | 88 (15)            |
|                                       | Neutral                                                                | 0                               | 6 (1)              |
|                                       | Disagree/ Strongly disagree                                            | 11 (2)                          | 6 (1)              |
|                                       | Helped identify areas in my diet to improve                            |                                 |                    |
|                                       | Agree/Strongly agree                                                   | 95 (18)                         | 100 (17)           |
|                                       | Neutral                                                                | 5 (1)                           | 0                  |
|                                       | Helped identify areas in my diet where I am doing well                 |                                 |                    |
| Agree/Strongly agree                  | 100 (19)                                                               | 100 (17)                        |                    |
| Helped me set diet goals              |                                                                        |                                 |                    |
| Agree/Strongly agree                  | 79 (15)                                                                | 82 (14)                         |                    |
| Neutral                               | 21 (4)                                                                 | 12 (2)                          |                    |
| Disagree                              | 0                                                                      | 6 (1)                           |                    |
| Physical Activity report              | I read/saw the Physical Activity Report                                |                                 |                    |
|                                       | Yes                                                                    | 82 (18)                         | 81 (17)            |
|                                       | No                                                                     | 18 (4)                          | 19 (4)             |
|                                       | Easy to understand                                                     |                                 |                    |
|                                       | Agree/Strongly agree                                                   | 94 (17)                         | 94 (16)            |
|                                       | Neutral                                                                | 6 (1)                           | 6 (1)              |
|                                       | Helped me identify areas in my physical activity to improve            |                                 |                    |
|                                       | Agree/Strongly agree                                                   | 89 (16)                         | 88 (15)            |
|                                       | Neutral                                                                | 11 (2)                          | 12 (2)             |
|                                       | Helped me identify areas in my physical activity where I am doing well |                                 |                    |
|                                       | Agree/Strongly agree                                                   | 78 (14)                         | 88 (15)            |
| Neutral                               | 22 (4)                                                                 | 12 (2)                          |                    |
| Helped me set physical activity goals |                                                                        |                                 |                    |
| Agree/Strongly agree                  | 78 (14)                                                                | 76 (13)                         |                    |
| Neutral                               | 22 (4)                                                                 | 18 (3)                          |                    |
| Disagree                              | 0                                                                      | 6 (1)                           |                    |
| Body Balance Beyond website: Content  | I accessed the BBB website                                             |                                 |                    |
|                                       | Yes                                                                    | 91 (20)                         | 57 (12)            |
|                                       | No                                                                     | 9 (2)                           | 43 (9)             |
|                                       | Provided me with useful information about my diabetes risk             |                                 |                    |
|                                       | Agree/Strongly agree                                                   | 95 (19)                         | 92 (11)            |
| Neutral                               | 5 (1)                                                                  | 8 (1)                           |                    |

|                                                                      |         |         |
|----------------------------------------------------------------------|---------|---------|
| Provided me with useful information about healthy eating             |         |         |
| Agree/Strongly agree                                                 | 90 (18) | 75 (9)  |
| Neutral                                                              | 10 (2)  | 25 (3)  |
| Provided me with useful information about physical activity          |         |         |
| Agree/Strongly agree                                                 | 85 (17) | 75 (9)  |
| Neutral                                                              | 15 (3)  | 25 (3)  |
| Provided me with useful information about weight-loss strategies     |         |         |
| Agree/Strongly agree                                                 | 65 (13) | 67 (8)  |
| Neutral                                                              | 35 (7)  | 33 (4)  |
| Provided me with useful information about other wellbeing strategies |         |         |
| Agree/Strongly agree                                                 | 55 (11) | 58 (7)  |
| Neutral                                                              | 45 (9)  | 42 (5)  |
| Helped me to attain my goals                                         |         |         |
| Agree/Strongly agree                                                 | 35 (7)  | 25 (3)  |
| Neutral                                                              | 55 (11) | 17 (2)  |
| Disagree                                                             | 10 (2)  | 58 (7)  |
| BBB website was motivating                                           |         |         |
| Agree/Strongly agree                                                 | 30 (6)  | 25 (3)  |
| Neutral                                                              | 45 (9)  | 17 (2)  |
| Disagree                                                             | 25 (5)  | 58 (7)  |
| Made me feel accountable                                             |         |         |
| Agree/Strongly agree                                                 | 35 (7)  | 50 (6)  |
| Neutral                                                              | 30 (6)  | 17 (2)  |
| Disagree                                                             | 35 (7)  | 33 (4)  |
| Easy to navigate                                                     |         |         |
| Agree/Strongly agree                                                 | 90 (18) | 75 (9)  |
| Neutral                                                              | 5 (1)   | 17 (2)  |
| Disagree                                                             | 5 (1)   | 8 (1)   |
| Visually appealing                                                   |         |         |
| Agree/Strongly agree                                                 | 80 (16) | 92 (11) |
| Neutral                                                              | 20 (4)  | 8 (1)   |
| Satisfaction with managing my risk                                   |         |         |
| Satisfied/Very satisfied                                             | 60 (12) | 58 (7)  |
| Neutral                                                              | 35 (7)  | 33 (4)  |
| Unsatisfied                                                          | 0       | 8 (1)   |
| Satisfaction with developing my plan                                 |         |         |
| Satisfied/Very satisfied                                             | 65 (13) | 58 (7)  |
| Neutral                                                              | 30 (6)  | 25 (3)  |
| Unsatisfied                                                          | 5 (1)   | 8 (1)   |
| Satisfaction with healthy eating resources                           |         |         |
| Satisfied/Very satisfied                                             | 75 (15) | 67 (8)  |
| Neutral                                                              | 25 (5)  | 33 (4)  |
| Satisfaction with physical activity resources                        |         |         |
| Satisfied/Very satisfied                                             | 70 (14) | 67 (8)  |
| Neutral                                                              | 30 (6)  | 33 (4)  |
| Satisfaction with wellbeing resources                                |         |         |
| Satisfied/Very satisfied                                             | 70 (14) | 58 (7)  |
| Neutral                                                              | 20 (4)  | 42 (5)  |
| Frequency using the Goal Setting Module                              |         |         |

|                                                         |                                                     |          |         |
|---------------------------------------------------------|-----------------------------------------------------|----------|---------|
|                                                         | At least once per week                              | 15 (3)   | 8 (1)   |
|                                                         | At least once per month                             | 70 (14)  | 42 (5)  |
|                                                         | Never                                               | 15 (3)   | 50 (6)  |
|                                                         | Made it easy to set weight-related goals            |          |         |
|                                                         | Agree/strongly agree                                | 82 (14)  | 100 (6) |
|                                                         | Neutral                                             | 18 (3)   | 0       |
|                                                         | Made it easy to set my nutrition goals              |          |         |
|                                                         | Agree/Strongly agree                                | 88 (15)  | 100 (6) |
|                                                         | Neutral                                             | 12 (2)   | 0       |
|                                                         | Made it easy to set my exercise goals               |          |         |
|                                                         | Agree/Strongly agree                                | 94 (14)  | 100 (6) |
|                                                         | Neutral                                             | 6 (1)    | 0       |
| <b>Body Balance Beyond website: Goal Setting Module</b> | I liked being able to select from pre-written goals |          |         |
|                                                         | Agree/Strongly agree                                | 82 (14)  | 100 (6) |
|                                                         | Neutral                                             | 18 (3)   | 0       |
|                                                         | Email summary of my goals was motivating            |          |         |
|                                                         | Agree/Strongly agree                                | 59 (10)  | 83 (5)  |
|                                                         | Neutral                                             | 24 (4)   | 0       |
|                                                         | Disagree                                            | 18 (3)   | 17 (1)  |
|                                                         | Email summary of my goals was useful                |          |         |
|                                                         | Agree/Strongly agree                                | 77 (13)  | 100 (6) |
|                                                         | Neutral                                             | 18 (3)   | 0       |
|                                                         | Disagree                                            | 6 (1)    | 0       |
|                                                         | Provided me with useful information about nutrition |          |         |
|                                                         | Agree/Strongly agree                                | 100 (13) | -       |
|                                                         | Increased my confidence to improve my diet          |          |         |
|                                                         | Agree/Strongly agree                                | 85 (11)  | -       |
|                                                         | Neutral                                             | 15 (2)   | -       |
|                                                         | Helped me to achieve my goals                       |          |         |
|                                                         | Agree/Strongly agree                                | 85 (11)  | -       |
|                                                         | Neutral                                             | 15 (2)   | -       |
|                                                         | Made me feel accountable                            |          |         |
|                                                         | Agree/Strongly agree                                | 100 (13) | -       |
|                                                         | Strategies addressed barriers to healthy eating     |          |         |
|                                                         | Agree/Strongly agree                                | 77 (10)  | -       |
|                                                         | Neutral                                             | 15 (2)   | -       |
|                                                         | Disagree                                            | 8 (1)    | -       |
| <b>Video coaching sessions: Dietitian<sup>†</sup></b>   | Email summary of goals and strategies was useful    |          |         |
|                                                         | Agree/Strongly agree                                | 100 (13) | -       |
|                                                         | Video coaching sessions were useful                 |          |         |
|                                                         | Agree/Strongly agree                                | 92 (12)  | -       |
|                                                         | Neutral                                             | 8 (1)    | -       |
|                                                         | Video coaching was easier than attending in person  |          |         |
|                                                         | Agree/Strongly agree                                | 92 (12)  | -       |
|                                                         | Disagree                                            | 8 (1)    | -       |
|                                                         | Number of sessions                                  |          |         |
|                                                         | About right                                         | 46 (6)   | -       |
|                                                         | Would have preferred more contact                   | 54 (7)   | -       |
|                                                         | Duration of sessions                                |          |         |
|                                                         | Too short                                           | 15 (2)   | -       |
|                                                         | About right                                         | 85 (11)  | -       |

|                                                                   |                                                           |                                   |                      |        |   |
|-------------------------------------------------------------------|-----------------------------------------------------------|-----------------------------------|----------------------|--------|---|
| <b>Video coaching sessions: Exercise physiologist<sup>b</sup></b> | Provided me with useful information about exercise        | Agree/Strongly agree              | 100 (13)             | -      |   |
|                                                                   | Increased my confidence to improve my activity behaviours | Agree/Strongly agree              | 92 (12)              | -      |   |
|                                                                   |                                                           | Neutral                           | 8 (1)                | -      |   |
|                                                                   | Helped me to achieve my goals                             | Agree/Strongly agree              | 85 (11)              | -      |   |
|                                                                   |                                                           | Neutral                           | 15 (2)               | -      |   |
|                                                                   | Motivated me to be more active                            | Agree/Strongly agree              | 100 (13)             | -      |   |
|                                                                   | Made me feel accountable                                  | Agree/Strongly agree              | 92 (12)              | -      |   |
|                                                                   |                                                           | Disagree                          | 8 (1)                | -      |   |
|                                                                   | Addressed barriers preventing me from being active        | Agree/Strongly agree              | 77 (10)              | -      |   |
|                                                                   |                                                           | Neutral                           | 23 (3)               | -      |   |
|                                                                   | Video coaching sessions were useful                       | Agree/Strongly agree              | 92 (12)              | -      |   |
|                                                                   |                                                           | Neutral                           | 8 (1)                | -      |   |
|                                                                   | Video coaching was easier than attending in person        | Agree/Strongly agree              | 92 (12)              | -      |   |
|                                                                   |                                                           | Disagree                          | 8 (1)                | -      |   |
|                                                                   | Number of sessions                                        | About right                       | 54 (7)               | -      |   |
|                                                                   |                                                           | Would have preferred more contact | 46 (6)               | -      |   |
|                                                                   | Duration of sessions                                      | Too short                         | 15 (2)               | -      |   |
|                                                                   |                                                           | About right                       | 85 (11)              | -      |   |
|                                                                   | <b>Video coaching sessions: Overall<sup>†</sup></b>       | Scheduling was appropriate        | Agree/Strongly agree | 62 (8) | - |
|                                                                   |                                                           |                                   | Neutral              | 15 (2) | - |
|                                                                   |                                                           | Disagree                          | 23 (3)               | -      |   |
| Picture quality was acceptable                                    |                                                           | Agree/Strongly agree              | 78 (10)              | -      |   |
|                                                                   |                                                           | Neutral                           | 8 (1)                | -      |   |
|                                                                   |                                                           | Disagree                          | 15 (2)               | -      |   |
| Sound quality was acceptable                                      |                                                           | Agree/Strongly agree              | 70 (9)               | -      |   |
|                                                                   |                                                           | Neutral                           | 15 (2)               | -      |   |
|                                                                   |                                                           | Disagree                          | 15 (2)               | -      |   |
| Video program was easy to use                                     |                                                           | Agree/Strongly agree              | 84 (11)              | -      |   |
|                                                                   |                                                           | Neutral                           | 8 (1)                | -      |   |
|                                                                   |                                                           | Disagree                          | 8 (1)                | -      |   |
| Technology issues delayed/prevented me from completing a session  |                                                           | Yes                               | 46 (7)               | -      |   |
|                                                                   | No                                                        | 54 (6)                            | -                    |        |   |
| Level of comfort interacting via video                            |                                                           |                                   |                      |        |   |

|  |                                                      |         |         |
|--|------------------------------------------------------|---------|---------|
|  | Comfortable/Very comfortable                         | 77 (10) | -       |
|  | Neutral                                              | 23 (3)  | -       |
|  | Overall satisfaction with video coaching             |         |         |
|  | Satisfied/Very satisfied                             | 69 (9)  | -       |
|  | Neutral                                              | 8 (1)   | -       |
|  | Unsatisfied/Very unsatisfied                         | 23 (3)  | -       |
|  | Provided me with useful information                  |         |         |
|  | Agree/Strongly agree                                 | -       | 84 (11) |
|  | Neutral                                              | -       | 8 (1)   |
|  | Disagree                                             | -       | 8 (1)   |
|  | Made me feel accountable                             |         |         |
|  | Agree/Strongly agree                                 | -       | 54 (6)  |
|  | Neutral                                              | -       | 23 (3)  |
|  | Disagree/Strongly disagree                           | -       | 23 (3)  |
|  | Increased my confidence to improve my diet           |         |         |
|  | Agree/Strongly agree                                 | -       | 22 (3)  |
|  | Neutral                                              | -       | 39 (5)  |
|  | Disagree/Strongly disagree                           | -       | 39 (5)  |
|  | Increased my confidence to improve my activity level |         |         |
|  | Agree/Strongly agree                                 | -       | 31 (4)  |
|  | Neutral                                              | -       | 31 (4)  |
|  | Disagree/Strongly disagree                           | -       | 38 (5)  |
|  | Helped me achieve my weight goals                    |         |         |
|  | Agree/Strongly agree                                 | -       | 8 (1)   |
|  | Neutral                                              | -       | 46 (6)  |
|  | Disagree/Strongly disagree                           | -       | 46 (6)  |
|  | Helped me achieve my nutrition goals                 |         |         |
|  | Agree/Strongly agree                                 | -       | 15 (2)  |
|  | Neutral                                              | -       | 46 (6)  |
|  | Disagree/Strongly disagree                           | -       | 39 (5)  |
|  | Helped me achieve my exercise goals                  |         |         |
|  | Agree/Strongly agree                                 | -       | 8 (1)   |
|  | Neutral                                              | -       | 46 (6)  |
|  | Disagree/Strongly disagree                           | -       | 46 (6)  |
|  | Helped me eat more healthily                         |         |         |
|  | Agree/Strongly agree                                 | -       | 46 (6)  |
|  | Neutral                                              | -       | 31 (4)  |
|  | Disagree/Strongly disagree                           | -       | 23 (3)  |
|  | Addressed healthy eating barriers                    |         |         |
|  | Agree/Strongly agree                                 | -       | 46 (6)  |
|  | Neutral                                              | -       | 15 (2)  |
|  | Disagree/Strongly disagree                           | -       | 39 (5)  |
|  | Helped me be more active                             |         |         |
|  | Agree/Strongly agree                                 | -       | 23 (3)  |
|  | Neutral                                              | -       | 23 (3)  |
|  | Disagree/Strongly disagree                           | -       | 54 (7)  |
|  | Addressed exercise barriers                          |         |         |
|  | Agree/Strongly agree                                 | -       | 39 (5)  |
|  | Neutral                                              | -       | 31 (4)  |
|  | Disagree/Strongly disagree                           | -       | 31 (4)  |
|  | Useful reminder to reflect on weight goals           |         |         |
|  | Agree/Strongly agree                                 | -       | 54 (7)  |

Text message support<sup>b</sup>

|                                                         |                                                       |         |         |
|---------------------------------------------------------|-------------------------------------------------------|---------|---------|
|                                                         | Neutral                                               | -       | 23 (3)  |
|                                                         | Disagree/Strongly disagree                            | -       | 23 (3)  |
|                                                         | Useful reminder to reflect on exercise goals          |         |         |
|                                                         | Agree/Strongly agree                                  | -       | 54 (7)  |
|                                                         | Neutral                                               | -       | 31 (4)  |
|                                                         | Disagree/Strongly disagree                            | -       | 15 (2)  |
|                                                         | Useful reminder to self-monitor                       |         |         |
|                                                         | Agree/Strongly agree                                  | -       | 46 (6)  |
|                                                         | Neutral                                               | -       | 23 (3)  |
|                                                         | Disagree/Strongly disagree                            | -       | 31 (4)  |
|                                                         | Personalised to my healthy eating barriers            |         |         |
|                                                         | Agree/Strongly agree                                  | -       | 46 (6)  |
|                                                         | Neutral                                               | -       | 23 (3)  |
|                                                         | Disagree/Strongly disagree                            | -       | 31 (4)  |
|                                                         | Personalised to my exercise barriers                  |         |         |
|                                                         | Agree/Strongly agree                                  | -       | 39 (5)  |
|                                                         | Neutral                                               | -       | 31 (4)  |
|                                                         | Disagree/Strongly disagree                            | -       | 31 (4)  |
|                                                         | Number of text messages                               |         |         |
|                                                         | Just right                                            | -       | 62 (8)  |
|                                                         | Would have preferred more                             | -       | 31 (4)  |
|                                                         | Would have preferred less                             | -       | 8 (1)   |
|                                                         | Overall satisfaction with text messages               |         |         |
|                                                         | Satisfied/Very satisfied                              | -       | 39 (5)  |
|                                                         | Neutral                                               | -       | 46 (6)  |
|                                                         | Unsatisfied/Very unsatisfied                          | -       | 15 (2)  |
|                                                         | I would recommend the program to other women with GDM |         |         |
|                                                         | Agree/Strongly agree                                  | 82 (18) | 87 (20) |
|                                                         | Neutral                                               | 17 (4)  | 13 (3)  |
| <b>Body Balance Beyond: Overall program<sup>b</sup></b> | The program met my expectations                       |         |         |
|                                                         | Agree/Strongly agree                                  | 59 (13) | 48 (11) |
|                                                         | Neutral                                               | 26 (6)  | 39 (9)  |
|                                                         | Disagree                                              | 14 (3)  | 13 (3)  |
|                                                         | I was satisfied with the program                      |         |         |
|                                                         | Agree/Strongly agree                                  | 68 (15) | 61 (14) |
|                                                         | Neutral                                               | 23 (5)  | 30 (7)  |
|                                                         | Disagree                                              | 9 (2)   | 9 (2)   |

<sup>a</sup> Responses for both high and low personalisation groups combined on account of similar responses between groups (not evaluated statistically due to low group numbers).

<sup>b</sup> High personalisation group only

Abbreviations: BBB, Body Balance Beyond; GDM, gestational diabetes mellitus
